# Supplementary material
Source: PubMed Central journal article supplement (PMC4421045)
Supplement: AEM.00057-15_zam999116282so1.pdf [file AEM.00057-15_zam999116282so1.pdf]

**FIG S1**

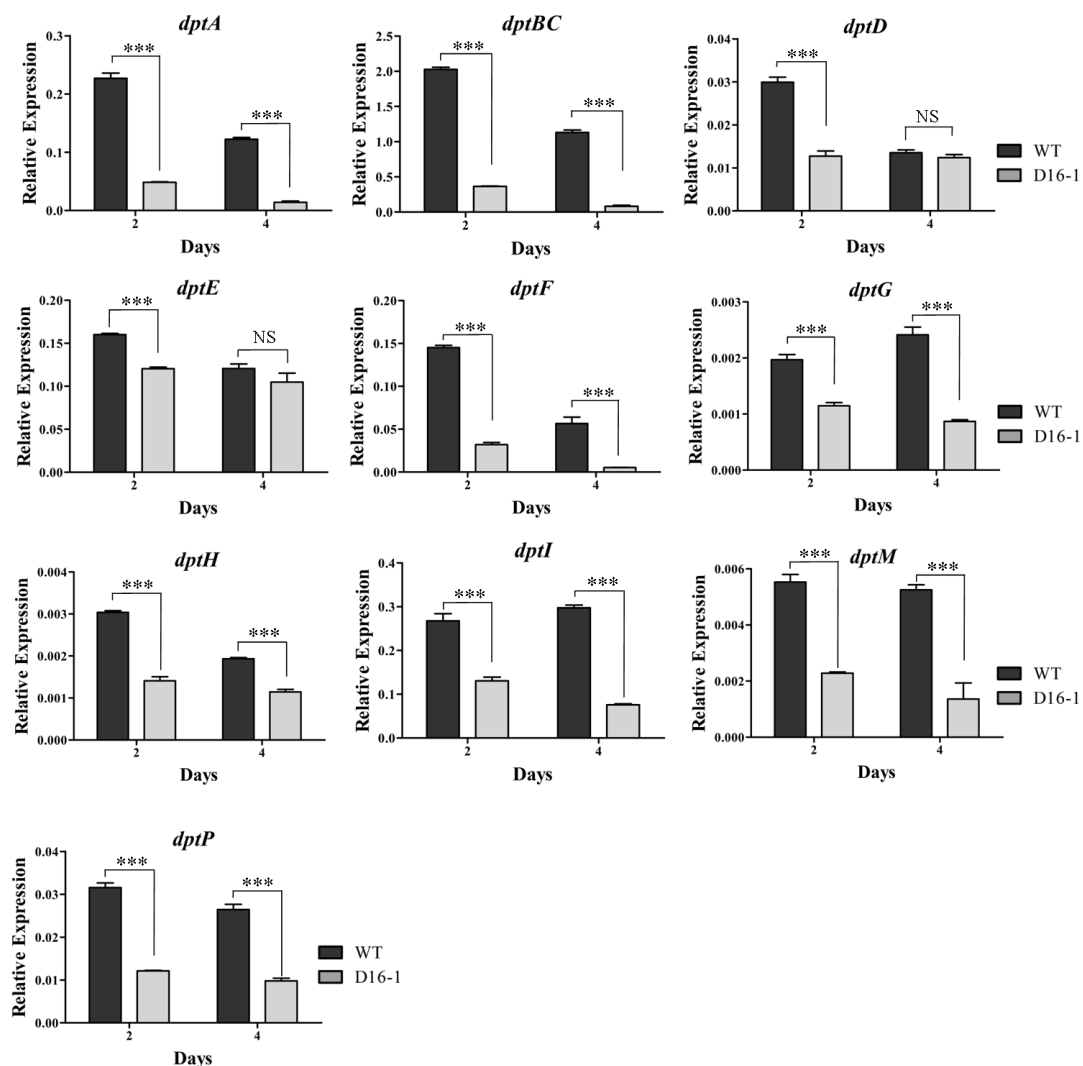

**FIG S1** Real-time RT-PCR analysis of transcription levels of *dpt* structural genes in WT and D16-1. RNA samples were isolated from 2- and 4-day fermentation cultures. Relative transcription levels of each gene were obtained after normalization against the internal reference *hrdB* at corresponding time points. Error bars: SD from three independent experiments. Statistical significance was determined by Student's *t*-test. \*\*\*,  $P < 0.001$ ; NS, not significant.

**FIG S2**

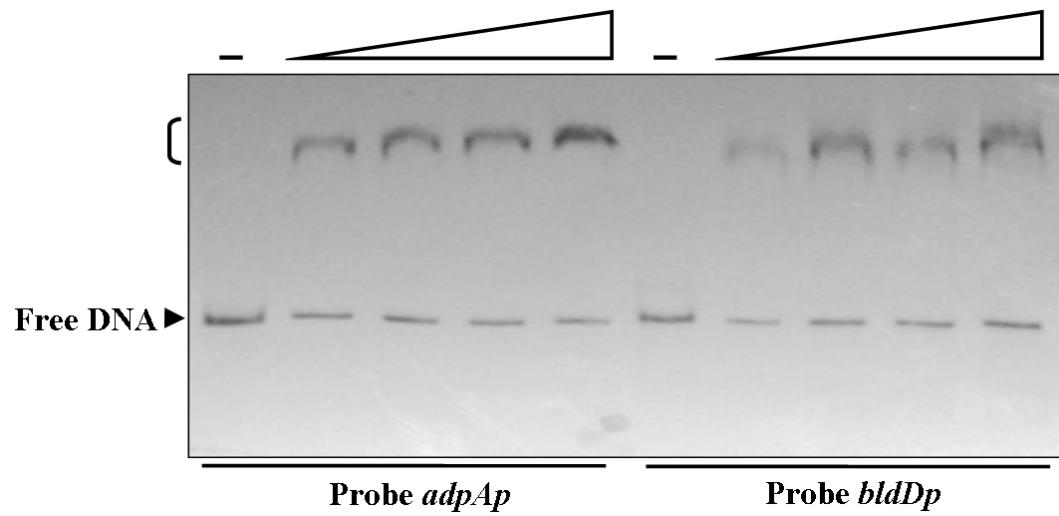

**FIG S2** EMSAs of DptR3 binding to the promoter regions of *adpA* and *bldD*. The promoter regions of *adpA* and *bldD* were labeled as probes *adpAp* and *bldDp*, respectively. Each lane contained 0.15 nM labeled probe. The labeled probes were incubated in the absence (-) or presence of various amounts (50, 100, 150, 200 ng) of His<sub>6</sub>-DptR3. Arrow: free probe. Square bracket: DptR3-DNA complex.
